# Supplementary material
Source: publisher figshare collection journal article supplement (https://karger.figshare.com/articles/dataset/_/11821551)
Supplement: Supplementary file 1 [file 1]

| Score | Injury score                                  | Inflammation score                                    |
|-------|-----------------------------------------------|-------------------------------------------------------|
| 0     | IEL intact, media compressed                  | No inflammatory cells around struts                   |
| 1     | IEL lacerated, media compressed               | Minimal lymphocytic infiltrate around struts          |
| 2     | IEL and media lacerated, EEL intact           | Localized moderate-dense cell aggregate around struts |
| 3     | EEL and media lacerated, struts in adventitia | Dense lymphohistocytic aggregate surrounding struts   |
